# Supplementary material for: Soil conditioner mixtures as an agricultural management alternative to mitigate drought impacts: a proof of concept
Source: Copernicus journal article supplement (doi:10.5194/nhess-25-1377-2025), 2025-04-09
Supplement: Supplementary file 1 [file nhess-25-1377-2025-supplement.pdf]

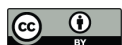

*Supplement of*

## **Soil conditioner mixtures as an agricultural management alternative to mitigate drought impacts: a proof of concept**

**Juan F. Dueñas et al.**

*Correspondence to:* Juan F. Dueñas ([juan.duenas@fu-berlin.de](mailto:juan.duenas@fu-berlin.de))

The copyright of individual parts of the supplement might differ from the article licence.

## Materials and methods

DNA was extracted from 3 soil washes, and 79 soil samples. Soil samples were obtained from the incubation experiment by collecting 2 mL of fresh soil which were then immediately stored at -20° C. All samples were extracted by means of a DNeasy PowerSoil Kit (Qiagen, Germany). The manufacturer's protocol was followed in the case of the soil samples, while in the case of the microbial wash, minor modifications were implemented. Soil samples were sublimed at a -20° C vacuum overnight to extract all moisture present at the moment of collection. Approximately 0.25 g of dry soil per sample were subjected to extraction. The microbial wash samples (2 ml) were centrifuged at 10000 g for 2 minutes. Excess water was removed, and the remaining solution was transferred into the PowerBead tube. After the final step, all three soil wash elutions were pooled in a single tube. DNA concentration of each sample was determined by fluorometry in a Qubit 3 apparatus (Thermo Fisher Scientific, Germany) following the manufacturer's protocol. The ratio of bacterial to fungal copy number  $\text{ng}^{-1}$  of DNA was estimated per sample by means of a quantitative PCR assay. Briefly, 5  $\mu\text{l}$  of 20 % (v/v) DNA template were added to 15  $\mu\text{l}$  of master mix. Since the DNA concentration of the microbial wash extract was low, 5  $\mu\text{l}$  of 100 % extract were added to the master mix in this particular case. The qPCR master mix contained 0.01 U  $\mu\text{l}^{-1}$  of KAPA HiFi polymerase (Roche, Germany), 1x Mg buffer, 0.3 mM of dNTP's mix, 0.5  $\mu\text{M}$  of EvaGreen (Jena Bioscience, Germany), sterile  $\text{H}_2\text{O}$  and 0.25  $\mu\text{M}$  of forward and reverse primers. To estimate the number of bacterial DNA copies, we employed primer pair 515F–926R (Parada et al., 2016; Quince et al., 2011). To estimate fungal copy number, we employed fITS7–ITS4 set (Ihrmark et al., 2012).

Calibration curves for qPCR assays were derived from custom made standards for both groups of organisms. Standards were obtained by amplifying fragments within the rDNA operon of bacteria or fungi which are long enough to contain the targeted fragment. The bacterial standard (c 1600 bp) was obtained by running a 50  $\mu\text{l}$  PCRs with primers 27f–1492r (Heuer et al., 1997). The fungal standard (c. 2900 bp) was obtained in a similar fashion, using primers NS31–LR5\_F (Simon et al., 1992; Tedersoo et al., 2008). 1  $\mu\text{l}$  of a homogenized pool of soil DNA extracts, consisting of a mixture of 1  $\mu\text{l}$  of each soil sample extract (total volume c 80  $\mu\text{l}$ ), was used as template for both these reactions. The concentration of the PCR products of each of these reactions was quantified fluorometrically as described before for the experimental samples. The standard fragment length (bp), an average molar mass of 660 ( $\text{g mol}^{-1}$ ), the Avogadro's constant ( $6.022 \times 10^{23} \text{ bp mol}^{-1}$ ), and the PCR product concentration ( $\text{ng } \mu\text{l}^{-1}$ ) were used to calculate the number of double stranded DNA copies  $\mu\text{l}^{-1}$  (Brankatschk et al., 2012) on each standard. Finally, a serial dilution of each standard representing a concentration gradient of template DNA was prepared (standard ladder, 7 steps).

The plate layout for the qPCR assays was set as follows: The first two columns of each plate were loaded with 15  $\mu\text{l}$  of master mix plus 5  $\mu\text{l}$  of the corresponding standard ladder, or with 5  $\mu\text{l}$  of sterile water in the case of negative controls. Four dilution steps of the standard ladder, were replicated three times in each plate (12 wells, 4 steps). Negative controls and the standard step with the lowest DNA concentration were replicated only twice per plate

(4 wells, 1 NC, 1 step). Finally, three technical replicates of each sample, including the microbial wash sample, were loaded (72 wells).

The qPCR program for the bacterial assay included a denaturation phase of 3 min at 95° C; 29 cycles of denaturation at 95° C for 20 s, annealing at 54°C for 30 s, elongation at 68° C for 30s; a final elongation step at 68° C for 5 minutes; and a scanning phase of a 65°–95° C for 15 min. The fungal assay consisted of an initial denaturation phase at 98° C for 3 min; followed by 29 cycles of denaturation at 98° C for 20 s, annealing at 50° C for 20 s, elongation at 72° C for 30 s; a final elongation step at 72° C for 5 min; and a scanning phase between 65°–95° C for 15 min. All qPCR assays were run in a CFX96 cycler (Bio-Rad Laboratories, Germany).

At the end of each run the relative fluorescence unit (RFU) scores of each well in the assay were imported into program LinRegPCR (Ruijter et al., 2009) to estimate PCR efficiencies per sample. Only samples with efficiencies greater than 50% were included in the analysis. The PCR efficiencies served to calculate a corrected quantification cycle (Cq) for each standard and sample on the plate. The standard curve was based on the relation between the corrected Cq scores of each standard dilution and their copy number estimate (Ruijter et al., 2021). A power function was fitted to this relationship (Fig. S1A, B). The equation from this fit was used to estimate the copy number of bacterial and fungal DNA  $\mu\text{l}^{-1}$  present on each sample, based on their corrected Cq scores of each sample.

All the data produced in this assay and used for calculations can be found in <https://doi.org/10.5281/zenodo.13311518>

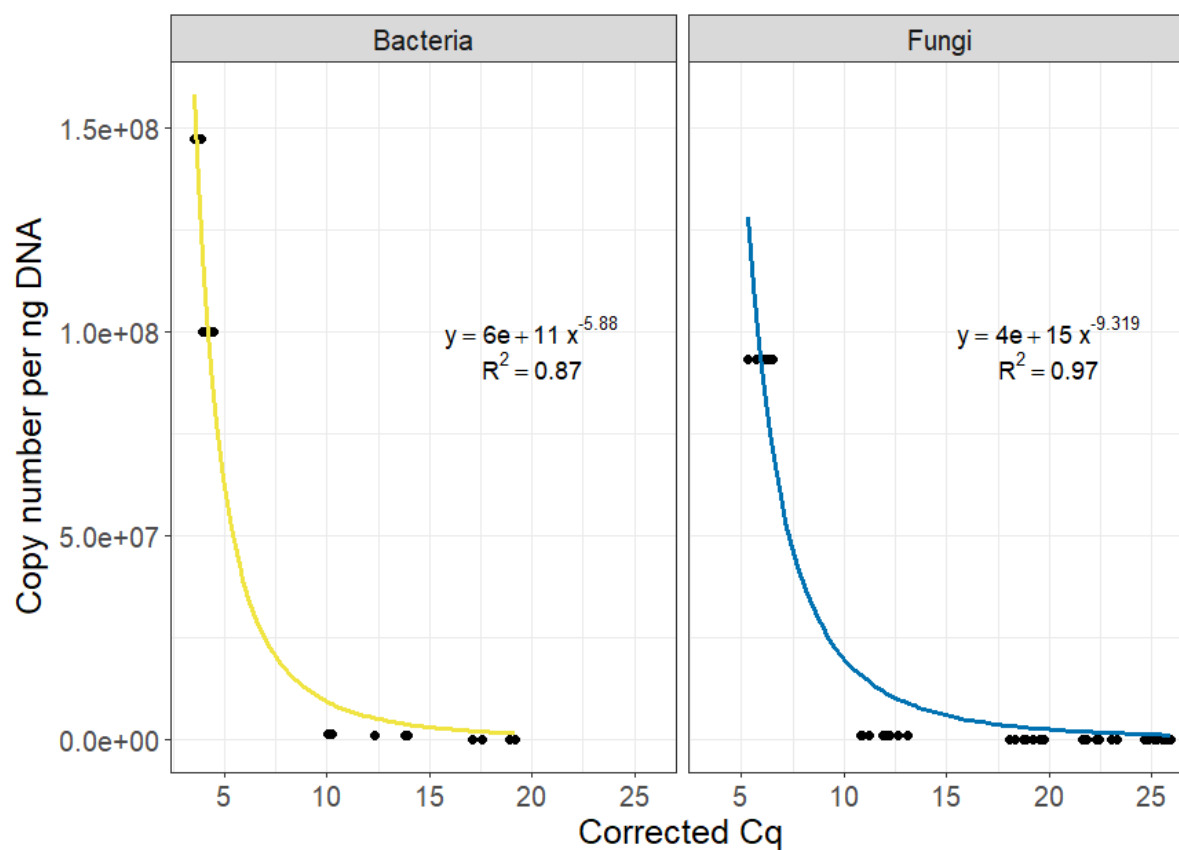

**Figure S1.** qPCR for calibration curves for bacteria, and fungi. The standard range was 1465.89–1.47E+08 copies  $\mu\text{l}^{-1}$  for bacteria (5 steps), whereas for fungi was 93.1–9.31E+07 copies  $\mu\text{l}^{-1}$ . The equations corresponding to the power functions depicted in the plots were used to estimate the copy number based on the corrected Cq of each sample in the assay.

**Figure S2.** Effects of the addition of individual amendments on the soil processes measured. The effect of each amendment type is measured in relation to non-amended soils (i.e. control). Faded circles represent individual samples, while the distribution to the right represents a density function. Model coefficients are presented in Table S3.

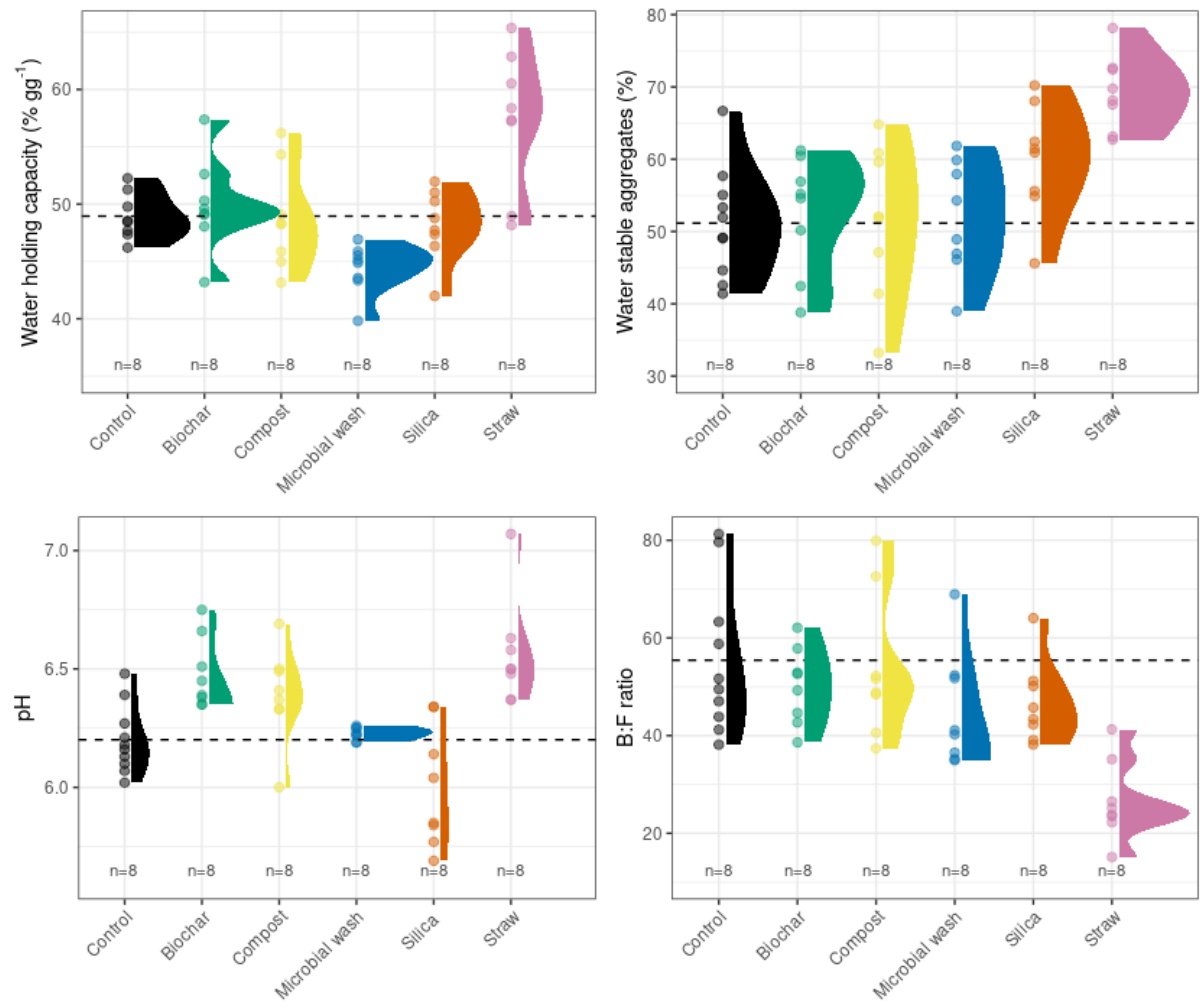

**Figure S3.** Conditioner richness compared against non-amended soils and a single conditioner at three times the individual dosage used in any of the mixtures (Biochar 3x). Each panel represents one of the variables monitored in this study. A label that describes the amendments contained on each random 3-way mixture was plotted next to the points representing a sample in this category. B=biochar, C=compost, M=microbial wash, SL=amorphous silica, SW=wheat straw.

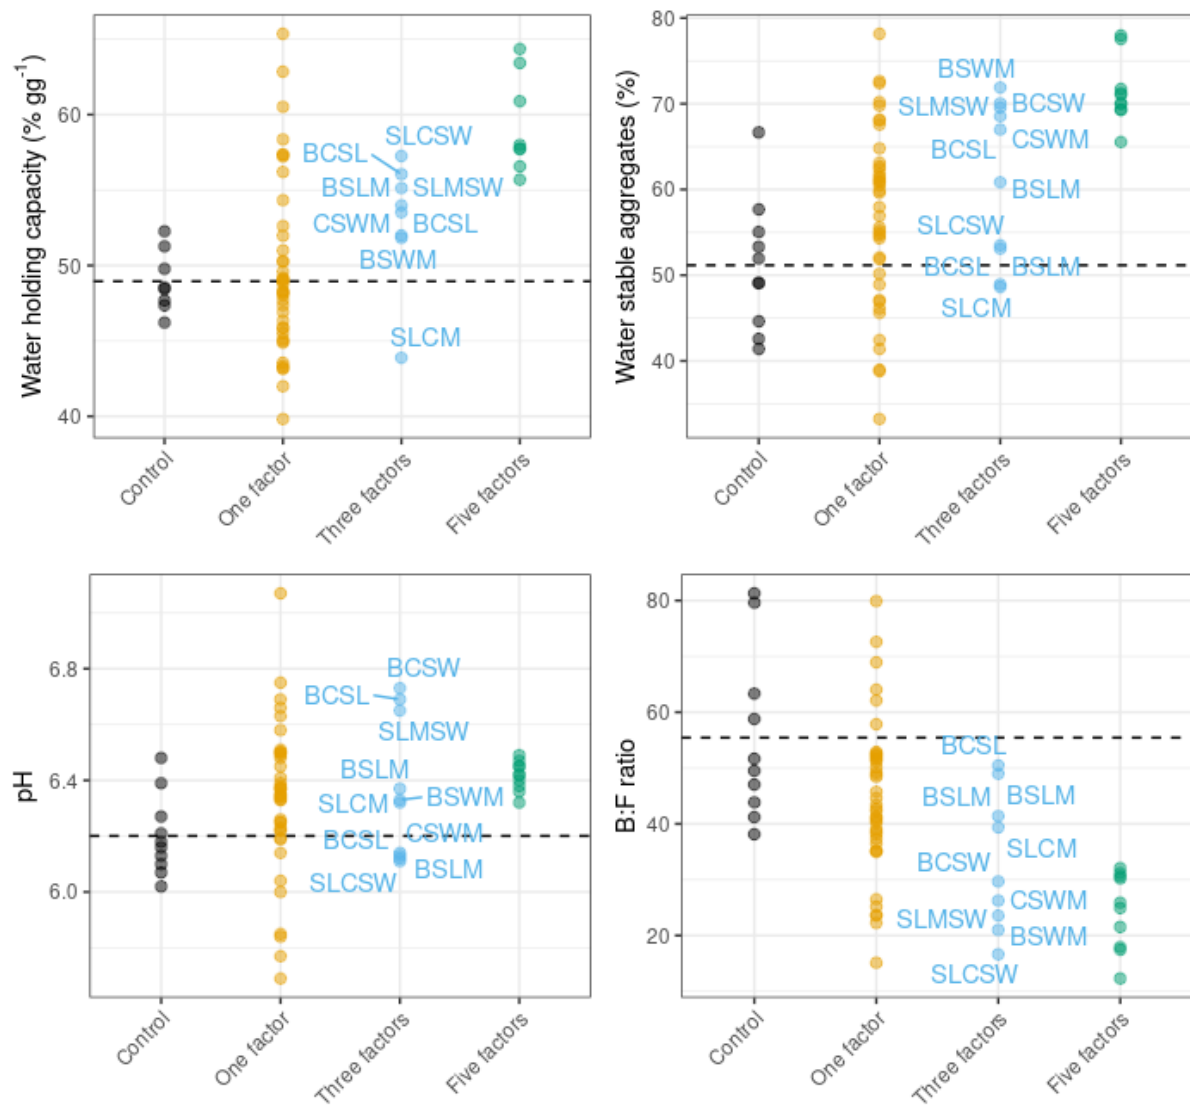

**Table S1.** Coefficients of all the models in which the number of factors is compared to the non-amended soils (Control or Intercept), and all the individual factors combined. The first two variables were fit with beta regressions while pH and B:F ratio were fitted with linear models. Consequently, the first two models contain coefficients for a precision estimate (phi).

| Response  | Factor    | Estimate | Std. Error | Wald Z | p     |
|-----------|-----------|----------|------------|--------|-------|
| mWHC      | Intercept | -0.042   | 0.070      | -0.599 | 0.549 |
|           | Nfactors1 | 0.032    | 0.077      | 0.411  | 0.681 |
|           | Nfactors3 | 0.159    | 0.099      | 1.609  | 0.108 |
|           | Nfactors5 | 0.416    | 0.100      | 4.167  | 0.000 |
|           | phi       | 101.044  | 17.775     | 5.685  | 0.000 |
| WSA       | Intercept | 0.046    | 0.115      | 0.405  | 0.685 |
|           | Nfactors1 | 0.236    | 0.129      | 1.839  | 0.066 |
|           | Nfactors3 | 0.408    | 0.164      | 2.482  | 0.013 |
|           | Nfactors5 | 0.839    | 0.170      | 4.934  | 0.000 |
|           | phi       | 29.344   | 4.881      | 6.012  | 0.000 |
| pH        | Intercept | 6.201    | 0.074      | 84.045 | 0.000 |
|           | Nfactors1 | 0.131    | 0.082      | 1.588  | 0.117 |
|           | Nfactors3 | 0.158    | 0.104      | 1.514  | 0.135 |
|           | Nfactors5 | 0.215    | 0.104      | 2.061  | 0.043 |
| B:F ratio | Intercept | 65.781   | 5.015      | 13.116 | 0.000 |
|           | Nfactors1 | -13.044  | 5.578      | -2.339 | 0.023 |
|           | Nfactors3 | -23.537  | 7.311      | -3.219 | 0.002 |
|           | Nfactors5 | -35.419  | 6.913      | -5.123 | 0.000 |

**Table S2** Model coefficients of all the models in which the number of factors is compared to the non-amended soils (Control or Intercept) and one factor at three times the concentration used on any particular mixture (Biochar, triple dosage). The first two variables were fit with beta regressions and the third (pH) is a liner model. Consequently, the first two models contain precision estimates (phi).

| Response  | Factor    | Estimate | Std. Error | Wald Z  | p     |
|-----------|-----------|----------|------------|---------|-------|
| mWHC      | Intercept | -0.042   | 0.042      | -1.010  | 0.312 |
|           | Nfactors1 | -0.015   | 0.059      | -0.257  | 0.797 |
|           | Nfactors3 | 0.160    | 0.059      | 2.713   | 0.007 |
|           | Nfactors5 | 0.419    | 0.060      | 7.026   | 0.000 |
|           | phi       | 285.521  | 71.256     | 4.007   | 0.000 |
| WSA       | Intercept | 0.047    | 0.098      | 0.477   | 0.634 |
|           | Nfactors1 | 0.179    | 0.140      | 1.280   | 0.200 |
|           | Nfactors3 | 0.412    | 0.141      | 2.919   | 0.004 |
|           | Nfactors5 | 0.848    | 0.146      | 5.800   | 0.000 |
|           | phi       | 40.246   | 8.895      | 4.524   | 0.000 |
| pH        | Intercept | 6.201    | 0.049      | 125.505 | 0.000 |
|           | Nfactors1 | 0.456    | 0.070      | 6.526   | 0.000 |
|           | Nfactors3 | 0.158    | 0.070      | 2.261   | 0.030 |
|           | Nfactors5 | 0.215    | 0.070      | 3.077   | 0.004 |
| B:F ratio | Intercept | 65.781   | 4.390      | 14.984  | 0.000 |
|           | Nfactors1 | -10.713  | 5.377      | -1.992  | 0.053 |
|           | Nfactors3 | -23.537  | 6.399      | -3.678  | 0.001 |
|           | Nfactors5 | -35.419  | 6.051      | -5.853  | 0.000 |



**Table S3** Model coefficients of the four models in which each factor added individually is compared to the non-amended soils (Control or Intercept). The first two variables were fit with beta regressions whereas pH and B:F ratio were fitted with linear models. Consequently, the first two models contain precision estimates (phi).

| Response  | Factor         | Estimate | Std. Error | Wald Z  | p     |
|-----------|----------------|----------|------------|---------|-------|
| mWHC      | Intercept      | -0.042   | 0.052      | -0.808  | 0.419 |
|           | Biochar        | 0.039    | 0.074      | 0.531   | 0.596 |
|           | Compost        | -0.007   | 0.074      | -0.095  | 0.924 |
|           | Microbial wash | -0.183   | 0.074      | -2.474  | 0.013 |
|           | Silica         | -0.031   | 0.074      | -0.419  | 0.675 |
|           | Straw          | 0.340    | 0.074      | 4.589   | 0.000 |
|           | phi            | 183.186  | 37.291     | 4.912   | 0.000 |
| WSA       | Intercept      | 0.047    | 0.096      | 0.491   | 0.623 |
|           | Biochar        | 0.050    | 0.144      | 0.351   | 0.726 |
|           | Compost        | 0.006    | 0.144      | 0.045   | 0.964 |
|           | Microbial wash | 0.027    | 0.144      | 0.186   | 0.852 |
|           | Silica         | 0.353    | 0.145      | 2.431   | 0.015 |
|           | Straw          | 0.757    | 0.150      | 5.052   | 0.000 |
|           | phi            | 42.689   | 8.442      | 5.057   | 0.000 |
| pH        | Intercept      | 6.201    | 0.057      | 109.059 | 0.000 |
|           | Biochar        | 0.279    | 0.085      | 3.271   | 0.002 |
|           | Compost        | 0.189    | 0.085      | 2.216   | 0.032 |
|           | Microbial wash | 0.025    | 0.085      | 0.296   | 0.769 |
|           | Silica         | -0.200   | 0.085      | -2.342  | 0.024 |
|           | Straw          | 0.362    | 0.085      | 4.239   | 0.000 |
| B:F ratio | Intercept      | 65.781   | 4.182      | 15.731  | 0.000 |
|           | Biochar        | -7.643   | 6.322      | -1.209  | 0.234 |
|           | Compost        | -1.419   | 6.096      | -0.233  | 0.817 |
|           | Microbial wash | -10.390  | 6.096      | -1.704  | 0.096 |
|           | Silica         | -11.210  | 6.322      | -1.773  | 0.084 |
|           | Straw          | -33.656  | 6.096      | -5.521  | 0.000 |

## References

- Brankatschk, R., Bodenhausen, N., Zeyer, J., and Bürgmann, H.: Simple Absolute Quantification Method Correcting for Quantitative PCR Efficiency Variations for Microbial Community Samples, *Applied and Environmental Microbiology*, 78, 4481–4489, <https://doi.org/10.1128/AEM.07878-11>, 2012.
- Heuer, H., Krsek, M., Baker, P., Smalla, K., and Wellington, E. M.: Analysis of actinomycete communities by specific amplification of genes encoding 16S rRNA and gel-electrophoretic separation in denaturing gradients, *Applied and Environmental Microbiology*, 63, 3233–3241, <https://doi.org/10.1128/aem.63.8.3233-3241.1997>, 1997.
- Ihrmark, K., Bodeker, I. T. M., Cruz-Martinez, K., Friberg, H., Kubartova, A., Schenck, J., Strid, Y., Stenlid, J., Brandstrom-Durling, M., Clemmensen, K. E., and Lindahl, B. D.: New primers to amplify the fungal ITS2 region - evaluation by 454-sequencing of artificial and natural communities, *FEMS Microbiol. Ecol.*, 82, 666–677, <https://doi.org/10.1111/j.1574-6941.2012.01437.x>, 2012.
- Parada, A. E., Needham, D. M., and Fuhrman, J. A.: Every base matters: assessing small subunit rRNA primers for marine microbiomes with mock communities, time series and global field samples, *Environmental Microbiology*, 18, 1403–1414, <https://doi.org/10.1111/1462-2920.13023>, 2016.
- Quince, C., Lanzen, A., Davenport, R. J., and Turnbaugh, P. J.: Removing noise from pyrosequenced amplicons, *BMC Bioinformatics*, 12, 38, <https://doi.org/10.1186/1471-2105-12-38>, 2011.
- Ruijter, J. M., Ramakers, C., Hoogaars, W. M. H., Karlen, Y., Bakker, O., van den Hoff, M. J. B., and Moorman, A. F. M.: Amplification efficiency: linking baseline and bias in the analysis of quantitative PCR data, *Nucleic Acids Research*, 37, e45, <https://doi.org/10.1093/nar/gkp045>, 2009.
- Ruijter, J. M., Barnewall, R. J., Marsh, I. B., Szentirmay, A. N., Quinn, J. C., van Houdt, R., Gunst, Q. D., and van den Hoff, M. J. B.: Efficiency correction is required for accurate quantitative PCR analysis and reporting, *Clinical Chemistry*, 67, 829–842, <https://doi.org/10.1093/clinchem/hvab052>, 2021.
- Simon, L., Lalonde, M., and Bruns, T. D.: Specific amplification of 18S fungal ribosomal genes from vesicular-arbuscular endomycorrhizal fungi colonizing roots, *Applied and Environmental Microbiology*, 58, 291–295, <https://doi.org/10.1128/aem.58.1.291-295.1992>, 1992.
- Tedersoo, L., Jairus, T., Horton, B. M., Abarenkov, K., Suvi, T., Saar, I., and Kõljalg, U.: Strong host preference of ectomycorrhizal fungi in a Tasmanian wet sclerophyll forest as revealed by DNA barcoding and taxon-specific primers, *New Phytologist*, 180, 479–490, <https://doi.org/10.1111/j.1469-8137.2008.02561.x>, 2008.
